# Supplementary material
Source: PubMed Central journal article supplement (PMC1567693)
Supplement: pnas_0602216103_2.pdf [file pnas_0602216103_2.pdf]

## A

GGTGGGATAA ACAGTAATGG CGGAGGCTGC GGCTCCCCTGGA ACAACAGCCA CAACATCAGG AGCAGGAGCG GCAGCGGCGG CGGTGGCAGC GGCCTCCCTC 100  
ACCTCTATCC CCACAGTCGC TGCCCCGTCC CCGGGGGCGG GAGGAGGGGG CGGCGGCAGC GACGGCAGCG GCGGCGGCTG GACGAAACAG GTCACCTGCA 200  
GATACTTTAT GCATGGGGTT TGTAAGGAAG GCGATAACTG TCGATACTCT CATGACCTCT CTGACAGTCC ATACGGCGTA GTGTGCAAGT ATTTTCAAAG 300  
AGGGTACTGT GTTTATGGAG ACCGCTGCAG ATACGAACAC AGCAAGCCAC TGAAACAGGA AGAAGTGACT GCTACTGATC TGAGTGCAAA ACCATCCCTC 400  
GCTGCTTCTT CAAGTCTCTC TTCTGGTGTG GGATCACTTG CTGAAATGAA TTCAGGCGAA GCTGAGTCAC GAAACCCAAG CTTTCCAAC TTAGGAGCAG 500  
GTTTCAGAGGA CTGGGTGAAT GCCATTGAGT TTGTCCCTGG GCAGCCCTAC TGTGGCCGTA gtaagtattg tgaggaccct gtaaaactgca atcaaagggc 600  
taaatgacag gccacagtga actcagtgtc agccttttct gtttgagctt aacctactgt caacacatta gattggggtta ttaagattt aaagatgaag 700  
taaaagaaaa attttgaact acaataaaat gaattcttgt ttaaaaactg 750

## B

MAEAAA PGTTATTSGAGAAAAVAAASLTS IPTVAAPSPGAGGGGGSDGSGGGWTKQVT **C**RYFMHGV**C**KEGDN**C**RYSH**H**DLSDSPYGVV**C**KYFQ  
RGY**C**VYGD**R****C**RYE**H**SKPLKQEEVTATDLSAKPSLAASSSLSSGVGSLAEMNSGEAESRNPSFPTVGAGSEDWVNAIEFVPGQPYCGRSKYCEDP  
VNCNQRAK (181 homologous residues, two zinc-fingers)

MAEAAA PGTTATTSGAGAAAAVAAASLTS IPTVAAPSPGAGGGGGSDGSGGGWTKQVT **C**RYFMHGV**C**KEGDN**C**RYSH**H**DLSDSPYGVV**C**KYFQ  
RGY**C**VYGD**R****C**RYE**H**SKPLKQEEVTATDLSAKPSLAASSSLSSGVGSLAEMNSGEAESRNPSFPTVGAGSEDWVNAIEFVPGQPYCGRTAPSCTE  
VPPQGSVTKEESEKEPTTVETKKQL**C**PYAAVGE**C**RYGEN**C**VYL**H**GD**S****C**DM**C**GLQVL**H**PVDAAQRS**O**HIKS**C**IEAHEKDMELSFVAVQRTKDMV**C**G  
I**C**MEVVYEKANPSERRFGILSN**C**NEY**C**LY**C**IRKWSAKQFESKIIKS**C**PE**C**CRITSNFVIPSEYWVEEKEEKQKLIQKYKEAMSNKA**C**RYFDEG  
RGS**C**PFGGN**C**FYKH**H**AYPDGRREEPQRQKVGTSRRYARRRSHFWELIEERENNPFDNDEEEVVT FELGEMLLMLLAAGGDELTDSEDEWDLFH  
DELEDFYDLDL (481 residues, 6 zinc-fingers)
